# Supplementary figures and images for: Toll‐interacting protein inhibits transforming growth factor beta signaling in mouse lung fibroblasts
Source: PubMed Central journal article supplement — FASEB Bioadv. 2023 Nov 29;6(1):12–25. doi: 10.1096/fba.2023-00054 (PMC10782472; doi:10.1096/fba.2023-00054), 2023-11-29

**Fig 1S****A**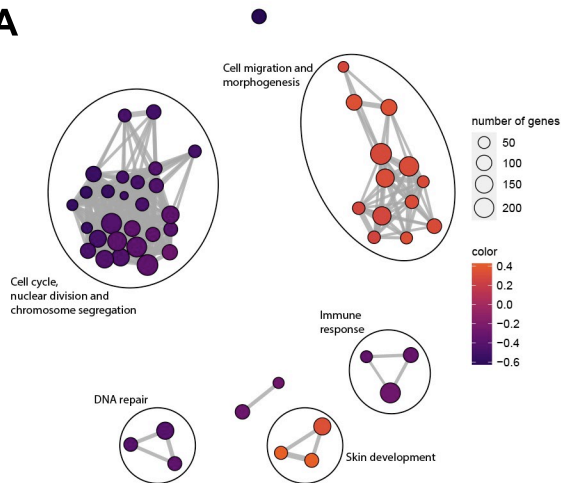**B**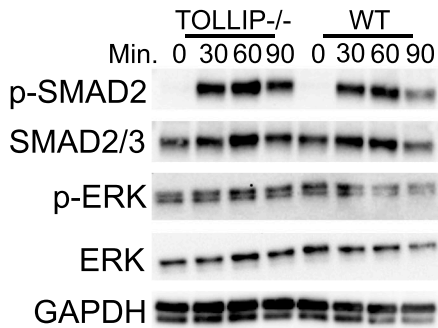**C**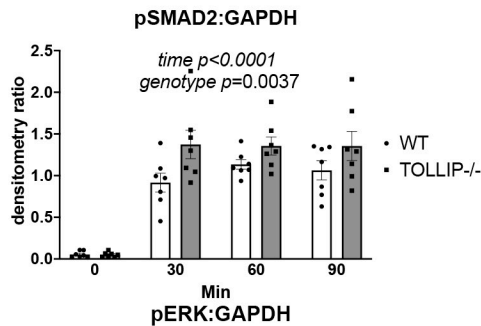**D**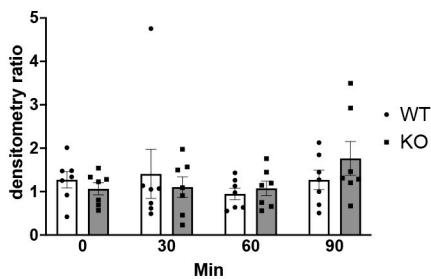

Supplement: FBA2-6-12-s001.pdf [file FBA2-6-12-s001.pdf]

# Fig 3S

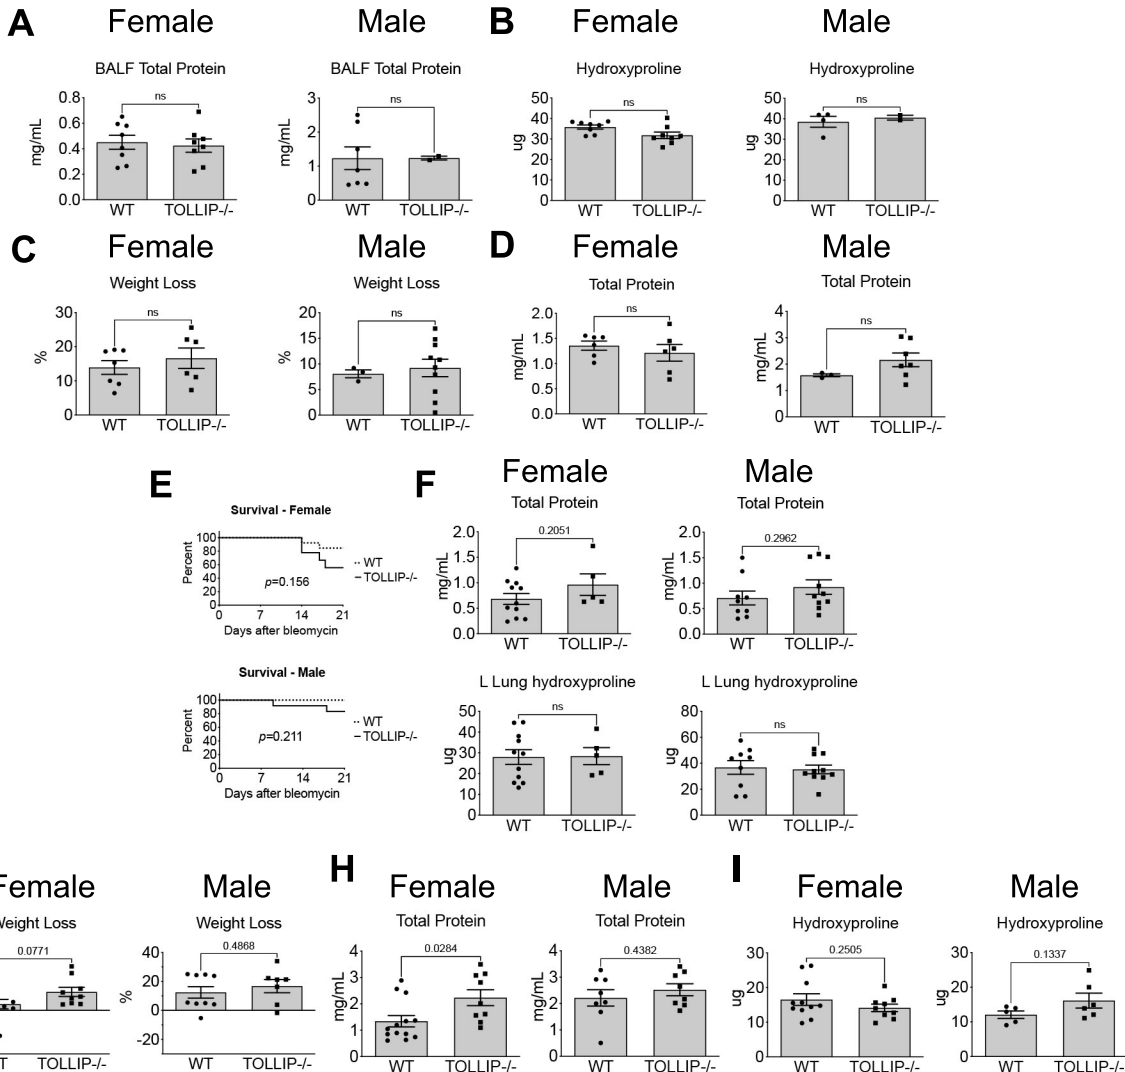

Supplement: FBA2-6-12-s003.pdf [file FBA2-6-12-s003.pdf]

# Fig 2S

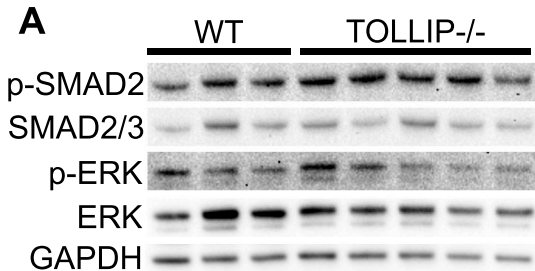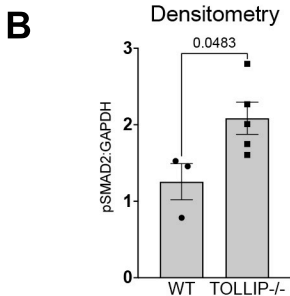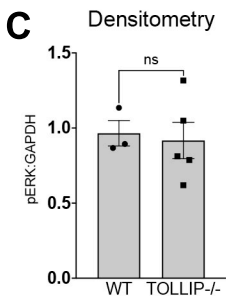

Supplement: FBA2-6-12-s004.pdf [file FBA2-6-12-s004.pdf]
